# Supplementary material for: Assessment of Sugar-Related Dietary Patterns to Personality Traits and Cognitive–Behavioural and Emotional Functioning in Working-Age Women
Source: MDPI journal article supplement (doi:10.3390/app14083176), 2024-04-10
Supplement: s1 [file s1]

**Table S1.** Intensity of daily consumption of selected product groups

| Frequency of product consumption                                                                              | Number of total participants N=624 (%N) |                 |
|---------------------------------------------------------------------------------------------------------------|-----------------------------------------|-----------------|
|                                                                                                               | n (%)                                   | Mean $\pm$ SD   |
| Fruits                                                                                                        |                                         |                 |
| Low intake                                                                                                    | 294 (47)                                |                 |
| Medium intake                                                                                                 | 192 (31)                                | 45.8 $\pm$ 32.7 |
| High intake                                                                                                   | 138 (22)                                |                 |
| Fruit juices                                                                                                  |                                         |                 |
| Low intake                                                                                                    | 560 (90)                                |                 |
| Medium intake                                                                                                 | 36 (6)                                  | 14.7 $\pm$ 22.6 |
| High intake                                                                                                   | 28 (4)                                  |                 |
| Candies                                                                                                       |                                         |                 |
| Low intake                                                                                                    | 435 (70)                                |                 |
| Medium intake                                                                                                 | 116 (19)                                | 31.1 $\pm$ 29.8 |
| High intake                                                                                                   | 73 (12)                                 |                 |
| Sweetened hot drinks <sup>1</sup>                                                                             |                                         |                 |
| Low intake                                                                                                    | 407 (65)                                |                 |
| Medium intake                                                                                                 | 60 (10)                                 | 33.4 $\pm$ 41.4 |
| High intake                                                                                                   | 157 (25)                                |                 |
| Sweetened carbonated or non-carbonated beverages <sup>2</sup>                                                 |                                         |                 |
| Low intake                                                                                                    | 593 (95)                                | 8.6 $\pm$ 17.6  |
| Medium intake                                                                                                 | 16 (3)                                  |                 |
| High intake                                                                                                   | 15 (2)                                  |                 |
| Energy drinks                                                                                                 |                                         |                 |
| Low intake                                                                                                    | 604 (97)                                |                 |
| Medium intake                                                                                                 | 10 (2)                                  | 5.2 $\pm$ 14.7  |
| High intake                                                                                                   | 10 (2)                                  |                 |
| Alcoholic beverages                                                                                           |                                         |                 |
| Low intake                                                                                                    | 616 (99)                                |                 |
| Medium intake                                                                                                 | 8 (1)                                   | 5.8 $\pm$ 8.1   |
| High intake                                                                                                   | 0 (0)                                   |                 |
| sDI <sup>3</sup>                                                                                              |                                         |                 |
| Low intake                                                                                                    | 416 (67)                                |                 |
| Medium intake                                                                                                 | 190 (30)                                | 20.7 $\pm$ 12.3 |
| High intake                                                                                                   | 18 (3)                                  |                 |
| Sweetened hot drinks <sup>1</sup> : e.g. black tea, coffee, herbal or fruit tea                               |                                         |                 |
| Sweetened carbonated or noncarbonated beverages <sup>2</sup> : e.g. Coca-Cola, Pepsi, Sprite, Fanta, lemonade |                                         |                 |
| sDI <sup>3</sup> – the sum of previously mentioned product groups                                             |                                         |                 |

**Table S2.** The food frequency intake of the study group (n = 624) described in means and medians

|                                   | Mean | ±SD  | Median | 95%CI |      |
|-----------------------------------|------|------|--------|-------|------|
| White bread and bakery products   | 0.66 | 0.60 | 0.50   | 0.62  | 0.71 |
| Wholemeal bread                   | 0.41 | 0.49 | 0.14   | 0.37  | 0.44 |
| White rice, pasta                 | 0.36 | 0.35 | 0.50   | 0.34  | 0.39 |
| Buckwheat, oats, wholegrain pasta | 0.36 | 0.40 | 0.14   | 0.33  | 0.39 |
| Fast food                         | 0.11 | 0.19 | 0.06   | 0.09  | 0.12 |
| Fried foods                       | 0.34 | 0.33 | 0.14   | 0.32  | 0.37 |
| Butter                            | 0.65 | 0.70 | 0.50   | 0.60  | 0.71 |
| Vegetable oils                    | 0.53 | 0.48 | 0.50   | 0.49  | 0.57 |
| Milk                              | 0.69 | 0.66 | 0.50   | 0.64  | 0.74 |
| Fermented milk drinks             | 0.40 | 0.42 | 0.50   | 0.37  | 0.44 |
| Fresh cheese curd products        | 0.33 | 0.40 | 0.14   | 0.30  | 0.36 |
| Cheese                            | 0.44 | 0.43 | 0.50   | 0.41  | 0.48 |
| Cured meat                        | 0.37 | 0.47 | 0.14   | 0.33  | 0.41 |
| Red meat                          | 0.12 | 0.21 | 0.06   | 0.11  | 0.14 |
| White meat                        | 0.33 | 0.30 | 0.50   | 0.30  | 0.35 |
| Fish                              | 0.12 | 0.16 | 0.06   | 0.11  | 0.14 |
| Eggs                              | 0.33 | 0.32 | 0.14   | 0.30  | 0.35 |
| Legumes-based foods               | 0.23 | 0.35 | 0.06   | 0.21  | 0.26 |
| Potatoes                          | 0.34 | 0.30 | 0.14   | 0.31  | 0.36 |
| Fruit                             | 0.92 | 0.65 | 1.00   | 0.87  | 0.97 |
| Vegetables                        | 1.04 | 0.70 | 1.00   | 0.98  | 1.09 |
| Candies                           | 0.62 | 0.60 | 0.50   | 0.58  | 0.67 |
| Fruit juices                      | 0.29 | 0.45 | 0.06   | 0.26  | 0.33 |
| Vegetable/fruit juices            | 0.16 | 0.29 | 0.06   | 0.14  | 0.18 |
| Sweetened hot beverages           | 0.67 | 0.83 | 0.14   | 0.60  | 0.73 |
| Sweetened beverages               | 0.17 | 0.35 | 0.06   | 0.14  | 0.20 |
| Energy drinks                     | 0.10 | 0.29 | 0.00   | 0.08  | 0.13 |
| Water                             | 1.69 | 0.63 | 2.00   | 1.64  | 1.74 |
| Alcoholic beverages               | 0.12 | 0.16 | 0.06   | 0.10  | 0.13 |
| pHDI                              | 4.83 | 2.48 | 4.56   | 4.63  | 5.02 |
| nHDI                              | 4.08 | 2.40 | 3.53   | 3.89  | 4.27 |
| sDI                               | 2.89 | 1.73 | 2.66   | 2.76  | 3.03 |

**Table S3.** Mean food frequency intake per day for high, medium and low adherence to the sweet-Western dietary pattern (SWDP)

|                                   | Low<br>adherence to<br>SWDP<br>n=208 |      | Medium<br>adherence to<br>SWDP<br>n=203 |      | High<br>adherence to<br>SWDP<br>n=213 |      |
|-----------------------------------|--------------------------------------|------|-----------------------------------------|------|---------------------------------------|------|
|                                   | Mean                                 | ±SD  | Mean                                    | ±SD  | Mean                                  | ±SD  |
| White bread and bakery products   | 0.30 <sup>a</sup>                    | 0.32 | 0.55 <sup>b</sup>                       | 0.45 | 1.12 <sup>c</sup>                     | 0.65 |
| Wholemeal bread                   | 0.43 <sup>ab</sup>                   | 0.47 | 0.45 <sup>a</sup>                       | 0.50 | 0.34 <sup>b</sup>                     | 0.49 |
| White rice, pasta                 | 0.30 <sup>a</sup>                    | 0.30 | 0.36 <sup>ab</sup>                      | 0.30 | 0.43 <sup>b</sup>                     | 0.42 |
| Buckwheat, oats, wholegrain pasta | 0.48 <sup>a</sup>                    | 0.45 | 0.36 <sup>b</sup>                       | 0.34 | 0.24 <sup>c</sup>                     | 0.35 |
| Fast food                         | 0.07 <sup>a</sup>                    | 0.07 | 0.11 <sup>ab</sup>                      | 0.19 | 0.14 <sup>b</sup>                     | 0.25 |
| Fried foods                       | 0.17 <sup>a</sup>                    | 0.19 | 0.32 <sup>b</sup>                       | 0.25 | 0.54 <sup>c</sup>                     | 0.40 |
| Butter                            | 0.26 <sup>a</sup>                    | 0.36 | 0.52 <sup>b</sup>                       | 0.55 | 1.16 <sup>c</sup>                     | 0.78 |
| Vegetable oils                    | 0.38 <sup>a</sup>                    | 0.37 | 0.52 <sup>b</sup>                       | 0.42 | 0.69 <sup>c</sup>                     | 0.56 |
| Milk                              | 0.61 <sup>a</sup>                    | 0.65 | 0.67 <sup>ab</sup>                      | 0.63 | 0.80 <sup>b</sup>                     | 0.69 |
| Fermented milk drinks             | 0.42 <sup>a</sup>                    | 0.48 | 0.40 <sup>a</sup>                       | 0.42 | 0.39 <sup>a</sup>                     | 0.37 |
| Fresh cheese curd products        | 0.30 <sup>a</sup>                    | 0.42 | 0.35 <sup>a</sup>                       | 0.40 | 0.33 <sup>a</sup>                     | 0.39 |
| Cheese                            | 0.24 <sup>a</sup>                    | 0.24 | 0.47 <sup>b</sup>                       | 0.37 | 0.62 <sup>c</sup>                     | 0.53 |
| Cured meat                        | 0.14 <sup>a</sup>                    | 0.19 | 0.29 <sup>b</sup>                       | 0.32 | 0.68 <sup>c</sup>                     | 0.59 |
| Red meat                          | 0.06 <sup>a</sup>                    | 0.12 | 0.12 <sup>b</sup>                       | 0.16 | 0.18 <sup>c</sup>                     | 0.29 |
| White meat                        | 0.24 <sup>a</sup>                    | 0.26 | 0.28 <sup>a</sup>                       | 0.23 | 0.45 <sup>b</sup>                     | 0.36 |
| Fish                              | 0.13 <sup>a</sup>                    | 0.15 | 0.13 <sup>a</sup>                       | 0.15 | 0.12 <sup>a</sup>                     | 0.19 |
| Eggs                              | 0.30 <sup>a</sup>                    | 0.34 | 0.33 <sup>a</sup>                       | 0.28 | 0.34 <sup>a</sup>                     | 0.34 |
| Legumes-based foods               | 0.31 <sup>a</sup>                    | 0.43 | 0.23 <sup>ab</sup>                      | 0.31 | 0.16 <sup>b</sup>                     | 0.27 |
| Potatoes                          | 0.23 <sup>a</sup>                    | 0.25 | 0.31 <sup>b</sup>                       | 0.23 | 0.46 <sup>c</sup>                     | 0.35 |
| Fruit                             | 0.86 <sup>a</sup>                    | 0.67 | 0.95 <sup>a</sup>                       | 0.65 | 0.94 <sup>a</sup>                     | 0.65 |
| Vegetables                        | 1.07 <sup>ab</sup>                   | 0.75 | 1.11 <sup>a</sup>                       | 0.68 | 0.94 <sup>b</sup>                     | 0.64 |
| Candies                           | 0.24 <sup>a</sup>                    | 0.25 | 0.57 <sup>b</sup>                       | 0.42 | 1.04 <sup>c</sup>                     | 0.70 |
| Fruit juices                      | 0.16 <sup>a</sup>                    | 0.29 | 0.28 <sup>b</sup>                       | 0.38 | 0.44 <sup>c</sup>                     | 0.58 |
| Vegetable/fruit juices            | 0.11 <sup>a</sup>                    | 0.19 | 0.16 <sup>ab</sup>                      | 0.25 | 0.21 <sup>b</sup>                     | 0.37 |
| Sweetened hot beverages           | 0.24 <sup>a</sup>                    | 0.50 | 0.67 <sup>b</sup>                       | 0.79 | 1.08 <sup>c</sup>                     | 0.91 |
| Sweetened beverages               | 0.04 <sup>a</sup>                    | 0.06 | 0.12 <sup>b</sup>                       | 0.20 | 0.35 <sup>c</sup>                     | 0.52 |
| Energy drinks                     | 0.04 <sup>a</sup>                    | 0.09 | 0.09 <sup>a</sup>                       | 0.25 | 0.18 <sup>b</sup>                     | 0.42 |
| Water                             | 1.66 <sup>a</sup>                    | 0.69 | 1.72 <sup>a</sup>                       | 0.57 | 1.70 <sup>a</sup>                     | 0.62 |
| Alcoholic beverages               | 0.09 <sup>a</sup>                    | 0.14 | 0.11 <sup>ab</sup>                      | 0.13 | 0.14 <sup>b</sup>                     | 0.20 |
| pHDI                              | 4.85 <sup>a</sup>                    | 2.77 | 4.93 <sup>a</sup>                       | 2.36 | 4.72 <sup>a</sup>                     | 2.28 |
| nHDI                              | 1.96 <sup>a</sup>                    | 0.86 | 3.63 <sup>b</sup>                       | 0.89 | 6.58 <sup>c</sup>                     | 2.14 |
| sDI                               | 1.67 <sup>a</sup>                    | 0.87 | 2.80 <sup>b</sup>                       | 1.22 | 4.17 <sup>c</sup>                     | 1.87 |

<sup>a,b,c</sup> - statistically significant differences are indicated by different letter inscriptions

**Table S4.** Mean food frequency intake per day for high, medium and low adherence to the pro-healthy dietary pattern (PHDP)

|                                   | Low<br>adherence to<br>PHDP<br>n=205 |      | Medium<br>adherence to<br>PHDP<br>n=206 |      | High<br>adherence to<br>PHDP<br>n=213 |      |
|-----------------------------------|--------------------------------------|------|-----------------------------------------|------|---------------------------------------|------|
|                                   | Mean                                 | ±SD  | Mean                                    | ±SD  | Mean                                  | ±SD  |
| White bread and bakery products   | 0.70 <sup>a</sup>                    | 0.61 | 0.70 <sup>a</sup>                       | 0.58 | 0.59 <sup>a</sup>                     | 0.62 |
| Wholemeal bread                   | 0.24 <sup>a</sup>                    | 0.33 | 0.42 <sup>b</sup>                       | 0.48 | 0.55 <sup>c</sup>                     | 0.57 |
| White rice, pasta                 | 0.29 <sup>a</sup>                    | 0.27 | 0.40 <sup>b</sup>                       | 0.38 | 0.40 <sup>b</sup>                     | 0.38 |
| Buckwheat, oats, wholegrain pasta | 0.14 <sup>a</sup>                    | 0.16 | 0.30 <sup>b</sup>                       | 0.31 | 0.63 <sup>c</sup>                     | 0.47 |
| Fast food                         | 0.11 <sup>a</sup>                    | 0.13 | 0.11 <sup>a</sup>                       | 0.19 | 0.10 <sup>a</sup>                     | 0.24 |
| Fried foods                       | 0.37 <sup>a</sup>                    | 0.32 | 0.39 <sup>a</sup>                       | 0.35 | 0.27 <sup>b</sup>                     | 0.31 |
| Butter                            | 0.70 <sup>a</sup>                    | 0.71 | 0.77 <sup>a</sup>                       | 0.71 | 0.49 <sup>b</sup>                     | 0.65 |
| Vegetable oils                    | 0.47 <sup>a</sup>                    | 0.45 | 0.57 <sup>a</sup>                       | 0.49 | 0.55 <sup>a</sup>                     | 0.48 |
| Milk                              | 0.52 <sup>a</sup>                    | 0.54 | 0.75 <sup>b</sup>                       | 0.64 | 0.80 <sup>b</sup>                     | 0.76 |
| Fermented milk drinks             | 0.25 <sup>a</sup>                    | 0.30 | 0.39 <sup>b</sup>                       | 0.35 | 0.56 <sup>c</sup>                     | 0.53 |
| Fresh cheese curd products        | 0.24 <sup>a</sup>                    | 0.31 | 0.35 <sup>b</sup>                       | 0.37 | 0.40 <sup>b</sup>                     | 0.49 |
| Cheese                            | 0.47 <sup>a</sup>                    | 0.45 | 0.47 <sup>a</sup>                       | 0.41 | 0.38 <sup>a</sup>                     | 0.43 |
| Cured meat                        | 0.43 <sup>a</sup>                    | 0.45 | 0.41 <sup>a</sup>                       | 0.49 | 0.28 <sup>b</sup>                     | 0.45 |
| Red meat                          | 0.13 <sup>a</sup>                    | 0.21 | 0.14 <sup>a</sup>                       | 0.24 | 0.10 <sup>a</sup>                     | 0.17 |
| White meat                        | 0.30 <sup>a</sup>                    | 0.23 | 0.39 <sup>b</sup>                       | 0.37 | 0.29 <sup>a</sup>                     | 0.29 |
| Fish                              | 0.09 <sup>a</sup>                    | 0.11 | 0.10 <sup>a</sup>                       | 0.12 | 0.17 <sup>b</sup>                     | 0.22 |
| Eggs                              | 0.23 <sup>a</sup>                    | 0.22 | 0.34 <sup>b</sup>                       | 0.31 | 0.41 <sup>b</sup>                     | 0.39 |
| Legumes-based foods               | 0.07 <sup>a</sup>                    | 0.08 | 0.17 <sup>b</sup>                       | 0.20 | 0.46 <sup>c</sup>                     | 0.48 |
| Potatoes                          | 0.27 <sup>a</sup>                    | 0.27 | 0.37 <sup>b</sup>                       | 0.28 | 0.37 <sup>b</sup>                     | 0.34 |
| Fruit                             | 0.32 <sup>a</sup>                    | 0.23 | 0.80 <sup>b</sup>                       | 0.34 | 1.61 <sup>c</sup>                     | 0.51 |
| Vegetables                        | 0.39 <sup>a</sup>                    | 0.24 | 0.90 <sup>b</sup>                       | 0.45 | 1.79 <sup>c</sup>                     | 0.41 |
| Candies                           | 0.44 <sup>a</sup>                    | 0.42 | 0.74 <sup>b</sup>                       | 0.64 | 0.69 <sup>b</sup>                     | 0.65 |
| Fruit juices                      | 0.27 <sup>ab</sup>                   | 0.44 | 0.37 <sup>a</sup>                       | 0.50 | 0.25 <sup>b</sup>                     | 0.41 |
| Vegetable/fruit juices            | 0.10 <sup>a</sup>                    | 0.19 | 0.20 <sup>b</sup>                       | 0.32 | 0.18 <sup>b</sup>                     | 0.32 |
| Sweetened hot beverages           | 0.63 <sup>ab</sup>                   | 0.76 | 0.80 <sup>a</sup>                       | 0.86 | 0.59 <sup>b</sup>                     | 0.85 |
| Sweetened beverages               | 0.17 <sup>a</sup>                    | 0.28 | 0.21 <sup>a</sup>                       | 0.39 | 0.15 <sup>a</sup>                     | 0.38 |
| Energy drinks                     | 0.11 <sup>a</sup>                    | 0.29 | 0.10 <sup>a</sup>                       | 0.26 | 0.10 <sup>a</sup>                     | 0.33 |
| Water                             | 1.43 <sup>a</sup>                    | 0.79 | 1.75 <sup>b</sup>                       | 0.56 | 1.89 <sup>c</sup>                     | 0.38 |
| Alcoholic beverages               | 0.11 <sup>a</sup>                    | 0.15 | 0.12 <sup>a</sup>                       | 0.17 | 0.11 <sup>a</sup>                     | 0.15 |
| pHDI                              | 2.57 <sup>a</sup>                    | 1.14 | 4.56 <sup>b</sup>                       | 1.34 | 7.26 <sup>c</sup>                     | 2.03 |
| nHDI                              | 4.02 <sup>ab</sup>                   | 2.12 | 4.57 <sup>a</sup>                       | 2.48 | 3.67 <sup>b</sup>                     | 2.50 |
| sDI                               | 2.04 <sup>a</sup>                    | 1.34 | 3.13 <sup>b</sup>                       | 1.63 | 3.49 <sup>b</sup>                     | 1.83 |

<sup>a,b,c</sup> - statistically significant differences are indicated by different letter inscriptions

**Table S5.** Mean food frequency intake per day for high, medium and low adherence to the dairy dietary pattern (DDP)

|                                   | Low adherence to DDP<br>n=205 |      | Medium adherence to DDP<br>n=207 |      | High adherence to DDP<br>n=212 |      |
|-----------------------------------|-------------------------------|------|----------------------------------|------|--------------------------------|------|
|                                   | Mean                          | ±SD  | Mean                             | ±SD  | Mean                           | ±SD  |
| White bread and bakery products   | 0.63 <sup>a</sup>             | 0.60 | 0.74 <sup>a</sup>                | 0.60 | 0.62 <sup>a</sup>              | 0.60 |
| Wholemeal bread                   | 0.29 <sup>ab</sup>            | 0.41 | 0.37 <sup>b</sup>                | 0.44 | 0.55 <sup>c</sup>              | 0.57 |
| White rice, pasta                 | 0.31 <sup>a</sup>             | 0.26 | 0.39 <sup>b</sup>                | 0.38 | 0.40 <sup>b</sup>              | 0.39 |
| Buckwheat, oats, wholegrain pasta | 0.27 <sup>a</sup>             | 0.32 | 0.31 <sup>a</sup>                | 0.29 | 0.50 <sup>b</sup>              | 0.50 |
| Fast food                         | 0.09 <sup>a</sup>             | 0.17 | 0.12 <sup>a</sup>                | 0.20 | 0.11 <sup>a</sup>              | 0.20 |
| Fried foods                       | 0.33 <sup>a</sup>             | 0.34 | 0.35 <sup>a</sup>                | 0.29 | 0.35 <sup>a</sup>              | 0.36 |
| Butter                            | 0.53 <sup>a</sup>             | 0.67 | 0.62 <sup>a</sup>                | 0.67 | 0.80 <sup>b</sup>              | 0.73 |
| Vegetable oils                    | 0.44 <sup>a</sup>             | 0.46 | 0.53 <sup>ab</sup>               | 0.43 | 0.62 <sup>b</sup>              | 0.51 |
| Milk                              | 0.42 <sup>a</sup>             | 0.54 | 0.74 <sup>b</sup>                | 0.65 | 0.90 <sup>c</sup>              | 0.70 |
| Fermented milk drinks             | 0.14 <sup>a</sup>             | 0.19 | 0.32 <sup>b</sup>                | 0.26 | 0.74 <sup>c</sup>              | 0.50 |
| Fresh cheese curd products        | 0.08 <sup>a</sup>             | 0.12 | 0.23 <sup>b</sup>                | 0.19 | 0.67 <sup>c</sup>              | 0.49 |
| Cheese                            | 0.18 <sup>a</sup>             | 0.22 | 0.43 <sup>b</sup>                | 0.29 | 0.71 <sup>c</sup>              | 0.53 |
| Cured meat                        | 0.28 <sup>a</sup>             | 0.41 | 0.33 <sup>a</sup>                | 0.39 | 0.50 <sup>b</sup>              | 0.56 |
| Red meat                          | 0.10 <sup>a</sup>             | 0.20 | 0.12 <sup>a</sup>                | 0.22 | 0.14 <sup>a</sup>              | 0.20 |
| White meat                        | 0.29 <sup>a</sup>             | 0.32 | 0.33 <sup>a</sup>                | 0.28 | 0.35 <sup>a</sup>              | 0.31 |
| Fish                              | 0.11 <sup>a</sup>             | 0.14 | 0.12 <sup>a</sup>                | 0.15 | 0.14 <sup>a</sup>              | 0.20 |
| Eggs                              | 0.25 <sup>a</sup>             | 0.29 | 0.31 <sup>a</sup>                | 0.24 | 0.41 <sup>b</sup>              | 0.39 |
| Legumes-based foods               | 0.24 <sup>a</sup>             | 0.40 | 0.21 <sup>a</sup>                | 0.30 | 0.25 <sup>a</sup>              | 0.34 |
| Potatoes                          | 0.34 <sup>a</sup>             | 0.34 | 0.33 <sup>a</sup>                | 0.29 | 0.34 <sup>a</sup>              | 0.27 |
| Fruit                             | 1.02 <sup>a</sup>             | 0.72 | 0.82 <sup>b</sup>                | 0.62 | 0.91 <sup>ab</sup>             | 0.62 |
| Vegetables                        | 1.09 <sup>a</sup>             | 0.74 | 0.96 <sup>a</sup>                | 0.66 | 1.06 <sup>a</sup>              | 0.67 |
| Candies                           | 0.81 <sup>a</sup>             | 0.71 | 0.55 <sup>b</sup>                | 0.54 | 0.51 <sup>b</sup>              | 0.47 |
| Fruit juices                      | 0.29 <sup>a</sup>             | 0.47 | 0.28 <sup>a</sup>                | 0.41 | 0.31 <sup>a</sup>              | 0.48 |
| Vegetable/fruit juices            | 0.15 <sup>a</sup>             | 0.31 | 0.15 <sup>a</sup>                | 0.24 | 0.18 <sup>a</sup>              | 0.30 |
| Sweetened hot beverages           | 0.67 <sup>a</sup>             | 0.85 | 0.66 <sup>a</sup>                | 0.82 | 0.68 <sup>a</sup>              | 0.82 |
| Sweetened beverages               | 0.18 <sup>a</sup>             | 0.37 | 0.14 <sup>a</sup>                | 0.30 | 0.19 <sup>a</sup>              | 0.38 |
| Energy drinks                     | 0.08 <sup>a</sup>             | 0.24 | 0.10 <sup>a</sup>                | 0.31 | 0.13 <sup>a</sup>              | 0.33 |
| Water                             | 1.70 <sup>a</sup>             | 0.67 | 1.66 <sup>a</sup>                | 0.64 | 1.71 <sup>a</sup>              | 0.58 |
| Alcoholic beverages               | 0.11 <sup>a</sup>             | 0.15 | 0.09 <sup>a</sup>                | 0.10 | 0.15 <sup>b</sup>              | 0.21 |
| pHDI                              | 3.96 <sup>a</sup>             | 2.03 | 4.41 <sup>a</sup>                | 2.12 | 6.08 <sup>b</sup>              | 2.69 |
| nHDI                              | 3.63 <sup>a</sup>             | 2.35 | 3.98 <sup>a</sup>                | 2.03 | 4.61 <sup>b</sup>              | 2.68 |
| sDI                               | 3.17 <sup>a</sup>             | 1.82 | 2.63 <sup>b</sup>                | 1.60 | 2.88 <sup>ab</sup>             | 1.72 |

<sup>a,b,c</sup> - statistically significant differences are indicated by different letter inscriptions

**Table S6.** TIPI-PL - results

| Number of question | Patients' perceptions of themselves | Number of total participants<br>N=624 (%N)<br>n (%) |
|--------------------|-------------------------------------|-----------------------------------------------------|
| 1                  | Extraverted, enthusiastic.          |                                                     |
|                    | Disagree strongly                   | 20 (3)                                              |
|                    | Disagree moderately                 | 61 (10)                                             |
|                    | Disagree a little                   | 60 (10)                                             |
|                    | Neither agree nor disagree          | 58 (9)                                              |
|                    | Agree a little                      | 96 (15)                                             |
|                    | Agree moderately                    | 237 (38)                                            |
| 2                  | Agree strongly                      | 92 (15)                                             |
|                    | Critical, quarrelsome.              |                                                     |
|                    | Disagree strongly                   | 148 (24)                                            |
|                    | Disagree moderately                 | 206 (33)                                            |
|                    | Disagree a little                   | 49 (8)                                              |
|                    | Neither agree nor disagree          | 70 (11)                                             |
|                    | Agree a little                      | 103 (17)                                            |
| 3                  | Agree moderately                    | 39 (6)                                              |
|                    | Agree strongly                      | 9 (1)                                               |
|                    | Dependable, self-disciplined.       |                                                     |
|                    | Disagree strongly                   | 23 (4)                                              |
|                    | Disagree moderately                 | 40 (6)                                              |
|                    | Disagree a little                   | 51 (8)                                              |
|                    | Neither agree nor disagree          | 62 (10)                                             |
| 4                  | Agree a little                      | 103 (17)                                            |
|                    | Agree moderately                    | 232 (37)                                            |
|                    | Agree strongly                      | 113 (18)                                            |
|                    | Anxious, easily upset.              |                                                     |
|                    | Disagree strongly                   | 46 (7)                                              |
|                    | Disagree moderately                 | 111 (18)                                            |
|                    | Disagree a little                   | 42 (7)                                              |
| 5                  | Neither agree nor disagree          | 58 (9)                                              |
|                    | Agree a little                      | 132 (21)                                            |
|                    | Agree moderately                    | 125 (20)                                            |
|                    | Agree strongly                      | 110 (18)                                            |
|                    | Open to new experiences, complex.   |                                                     |
|                    | Disagree strongly                   | 5 (1)                                               |
|                    | Disagree moderately                 | 38 (6)                                              |
| 6                  | Disagree a little                   | 26 (4)                                              |
|                    | Neither agree nor disagree          | 76 (12)                                             |
|                    | Agree a little                      | 131 (21)                                            |
|                    | Agree moderately                    | 224 (36)                                            |
|                    | Agree strongly                      | 124 (20)                                            |
|                    | Reserved, quiet.                    |                                                     |
|                    | Disagree strongly                   | 117 (19)                                            |
|                    | Disagree moderately                 | 170 (27)                                            |
|                    | Disagree a little                   | 33 (5)                                              |

|    |                            |          |
|----|----------------------------|----------|
|    | Neither agree nor disagree | 57 (9)   |
|    | Agree a little             | 123 (20) |
|    | Agree moderately           | 87 (14)  |
|    | Agree strongly             | 37 (6)   |
|    | Sympathetic, warm.         |          |
|    | Disagree strongly          | 6 (1)    |
|    | Disagree moderately        | 16 (3)   |
|    | Disagree a little          | 21 (3)   |
| 7  | Neither agree nor disagree | 43 (7)   |
|    | Agree a little             | 82 (13)  |
|    | Agree moderately           | 299 (48) |
|    | Agree strongly             | 157 (25) |
|    | Disorganised, careless.    |          |
|    | Disagree strongly          | 187 (30) |
|    | Disagree moderately        | 214 (34) |
|    | Disagree a little          | 47 (8)   |
| 8  | Neither agree nor disagree | 55 (9)   |
|    | Agree a little             | 65 (10)  |
|    | Agree moderately           | 34 (5)   |
|    | Agree strongly             | 22 (4)   |
|    | Calm, emotionally stable.  |          |
|    | Disagree strongly          | 130 (21) |
|    | Disagree moderately        | 150 (24) |
|    | Disagree a little          | 90 (14)  |
| 9  | Neither agree nor disagree | 86 (14)  |
|    | Agree a little             | 64 (10)  |
|    | Agree moderately           | 85 (14)  |
|    | Agree strongly             | 19 (3)   |
|    | Conventional, uncreative.  |          |
|    | Disagree strongly          | 35 (6)   |
|    | Disagree moderately        | 137 (22) |
|    | Disagree a little          | 47 (8)   |
| 10 | Neither agree nor disagree | 165 (26) |
|    | Agree a little             | 104 (17) |
|    | Agree moderately           | 115 (18) |
|    | Agree strongly             | 21 (3)   |

**Table S7.** TIPI-PL - intensity of features

| Number of total participants N=624 (%N) |                       |          |               |
|-----------------------------------------|-----------------------|----------|---------------|
| Feature                                 | Intensity of features | n (%)    | Mean $\pm$ SD |
| Extraversion                            | Low                   | 225 (36) | 4.7 $\pm$ 1.6 |
|                                         | Medium                | 276 (44) |               |
|                                         | High                  | 123 (20) |               |
| Agreeableness                           | Low                   | 251 (40) | 5.4 $\pm$ 1.2 |
|                                         | Medium                | 185 (30) |               |
|                                         | High                  | 188 (30) |               |
| Conscientiousness                       | Low                   | 260 (42) | 5.2 $\pm$ 1.5 |
|                                         | Medium                | 183 (29) |               |
|                                         | High                  | 181 (29) |               |
| Emotional Stability                     | Low                   | 260 (42) | 3.4 $\pm$ 1.7 |
|                                         | Medium                | 167 (27) |               |
|                                         | High                  | 197 (31) |               |
| Openness to Experiences                 | Low                   | 231 (37) | 4.7 $\pm$ 1.1 |
|                                         | Medium                | 202 (32) |               |
|                                         | High                  | 191 (31) |               |

**Table S8.** TFEQ-13 - interpreted results

| Number of total participants N=624 (%N) |                       |          |               |
|-----------------------------------------|-----------------------|----------|---------------|
| Subscale                                | Severity of disorders | n (%)    | Mean $\pm$ SD |
| Cognitive restraint<br>(R1–R5)          | Low                   | 227 (36) | 7.3 $\pm$ 2.3 |
|                                         | Medium                | 219 (35) |               |
|                                         | High                  | 178 (29) |               |
| Uncontrolled eating<br>(J1–J5)          | Low                   | 233 (37) | 9.2 $\pm$ 2.9 |
|                                         | Medium                | 181 (29) |               |
|                                         | High                  | 210 (34) |               |
| Emotional eating<br>(E1–E3)             | Low                   | 283 (45) | 5.3 $\pm$ 2.4 |
|                                         | Medium                | 141 (23) |               |
|                                         | High                  | 200 (32) |               |
